# Supplementary material for: Evaluating the relationship between circulating lipoprotein lipids and apolipoproteins with risk of coronary heart disease: A multivariable Mendelian randomisation analysis
Source: PLoS Med. 2020 Mar 23;17(3):e1003062. doi: 10.1371/journal.pmed.1003062 (PMC7089422; doi:10.1371/journal.pmed.1003062)
Supplement: S12 Table — Beta, effect estimate; HDL, high-density lipoprotein; LDL, low-density lipoprotein; MR, Mendelian randomisation; nSNPs, number of single nucleotide polymorphisms; P, corresponding P-value; SE, standard error of the effect estimate. (XLSX) [file pmed.1003062.s015.xlsx]

## Sheet: S12 Table
S12 Table: Genetically determined effect estimates from univariable and multivariable Mendelian randomization analyses (LDL, HDL and Apo A1)
Beta - effect estimate, HDL - high-density lipoprotein, LDL - low-density lipoprotein, nSNPs - number of genetic variants used as instrumental variables, P - corresponding p -value, SE- standard error of the effect estimate
		Univariable analysis			Multivariable analysis
Exposure	nSNPs	Beta	SE	P	Beta	SE	P
LDL cholesterol	209	0.512087	0.0561316	7.31 x 10-20	0.517701	0.0441966	2.63 x 10-32
HDL cholesterol	490	-0.220648	0.0339431	8.00 x 10-11	-0.256116	0.105625	0.0153185
Apolipoprotein A1	407	-0.187713	0.039177	1.66 x 10-06	0.0230207	0.108601	0.832126
