# Supplementary material for: Evaluating the relationship between circulating lipoprotein lipids and apolipoproteins with risk of coronary heart disease: A multivariable Mendelian randomisation analysis
Source: PLoS Med. 2020 Mar 23;17(3):e1003062. doi: 10.1371/journal.pmed.1003062 (PMC7089422; doi:10.1371/journal.pmed.1003062)
Supplement: S14 Table — apoB, apolipoprotein B; Beta, beta coefficient; BP, base position; CHR, chromosome; eaf, effect allele frequency; p, P-value; SE, standard error. (XLSX) [file pmed.1003062.s017.xlsx]

## Sheet: S14 Table
S14 Table: Effect estimates of 13 loci associated with apolipoprotein B but not the other 4 traits based on P<5x10-08
apoB - apolipoprotein B, CHR - chromosome, BP - base position, eaf - effect allele frequency, beta - Beta coefficient, SE - standard error, p - p-value
						ApoB			HDL-C			LDL-C			TG			ApoA1
SNP	CHR	BP	effect allele	other allele	eaf	apob_beta	apob_se	apob_p	hdl_beta	hdl_se	hdl_p	ldl_beta	ldl_se	ldl_p	tg_beta	tg_se	tg_p	apoa1_beta	apoa1_se	apoa1_p
rs112426331	1	109627073	G	A	0.957297	0.0344284	0.00519512	3.4e-11	-0.0176909	0.00477126	0.00021	0.0222522	0.00521616	2e-05	0.00912905	0.0049819	0.067	-0.0215996	0.00491501	1.1e-05
rs188608977	1	109725404	G	T	0.989419	-0.0619017	0.0103757	2.4e-09	-0.0102601	0.00953436	0.28	-0.0481613	0.0104243	3.8e-06	-0.00594691	0.00995668	0.55	-0.0062375	0.00982394	0.53
rs6426328	1	246891260	G	T	0.510213	-0.0120957	0.00207456	5.5e-09	0.00377327	0.00190393	0.047	-0.00875642	0.00208335	2.6e-05	0.000634794	0.00198984	0.75	0.00433448	0.00196083	0.027
rs11693526	2	22347500	T	C	0.929835	-0.0294757	0.00432172	9.1e-12	0.0110509	0.00396255	0.0053	-0.0195375	0.00434231	6.8e-06	-0.00957644	0.00414111	0.021	0.0159946	0.00408265	8.9e-05
rs7601153	2	158447571	C	G	0.602788	0.012034	0.00211719	1.3e-08	0.00433262	0.00194324	0.026	0.011101	0.00212762	1.8e-07	0.00333	0.00202872	0.1	0.00242009	0.00200203	0.23
rs7603427	2	204317553	C	T	0.466563	-0.0135798	0.00207987	6.6e-11	0.00434854	0.00190969	0.023	-0.011178	0.00209015	8.9e-08	-0.00637187	0.00199303	0.0014	0.00111341	0.00196761	0.57
rs72663045	4	74177397	T	G	0.97928	-0.042351	0.00734855	8.3e-09	-0.00808222	0.0067329	0.23	-0.0367565	0.00737518	6.2e-07	-0.024861	0.00703582	0.00041	-0.0181653	0.00693047	0.0088
rs147539187	6	11839042	C	G	0.926256	0.0227989	0.00398277	1e-08	-0.00124459	0.00365527	0.73	0.0211544	0.0039964	1.2e-07	0.013927	0.0038124	0.00026	-7.69718e-06	0.00376576	1
rs55804343	6	39234907	C	T	0.703761	-0.0160869	0.00228049	1.7e-12	-0.0032028	0.00208962	0.13	-0.0123171	0.00228803	7.3e-08	-0.00541918	0.00218265	0.013	-0.00700618	0.00215277	0.0011
rs56402930	15	91072962	A	G	0.0928426	0.0196542	0.00359003	4.4e-08	-0.00429239	0.00328419	0.19	0.0161009	0.00360034	7.7e-06	0.0125329	0.00343699	0.00027	-0.00445134	0.00337781	0.19
rs145725232	19	46752541	G	A	0.984189	0.0549216	0.00886818	5.9e-10	-0.0130728	0.00823992	0.11	0.0441919	0.00894293	7.8e-07	0.00706429	0.00858716	0.41	-0.0211185	0.00848058	0.013
rs67038483	21	33096103	C	T	0.955007	-0.0275587	0.00502305	4.1e-08	-0.00434451	0.00462296	0.35	-0.0227153	0.00503771	6.5e-06	-0.0131836	0.00481511	0.0062	-0.00467261	0.0047567	0.33
